# Supplementary material
Source: publisher figshare collection journal article supplement (https://acs.figshare.com/ndownloader/files/4553917)
Supplement: Supplementary file 1 [file 4553917]

#\#CIF_1.1
 
#  CIF produced by WinGX routine CIF_UPDATE
#  Created on 2008-10-04 at 00:11:06
#  Using CIFtbx version 2.6.2 16 Jun 1998
 
#  Dictionary name : cif_core.dic
#  Dictionary vers : 2.3
#  Request file    : c:\wingx\files\archive.dat
#  CIF files read  : ln097 ln097non
 
#
#     CCDC ELECTRONIC DATA DEPOSITION FORM (CIF)
#
#     This electronic data deposition form can be used:
#
#     (a) WHEN SUBMITTING A PAPER TO A JOURNAL FOR PUBLICATION or
#     (b) WHEN SUBMITTING A PRIVATE COMMUNICATION TO THE CCDC
#
#     A comprehensive archive of CIF resources is maintained by the IUCr
#     at its Chester office. This can be accessed
#     by anonymous ftp to ftp.iucr.org
#     or via the WWW at http://www.iucr.org/cif/home.html
#     If data items in this form are not available or not applicable
#     then ignore these items
#     A few items specific to CCDC input are indicated by _ccdc_
#
#     Submission and help information is provided at the end of this form
#-------------------------------------------------------------------------
#1    Global data block identification for start of deposition
 
data_global
 
#
#-------------------------------------------------------------------------
#2    Person making the deposition
#
_publ_contact_author               'Bein, Thomas'
_publ_contact_author_email          tbein@cup.uni-muenchen.de
 
#-------------------------------------------------------------------------
#3    Publication details
#
#     Provide these details if the structure has been published,
#     accepted or submitted for publication
#
#     The CCDC journal deposition number, eg. 182/357,
#     should be included only if it has been assigned by the journal
#
loop_
_publ_author_name
 
'Bein, Thomas.'
 
_journal_name_full                 'private communication'
_journal_volume                    ?
_journal_page_first                ?
_journal_page_last                 ?
_journal_year                      ?
_ccdc_journal_depnumber            ?
#
#-------------------------------------------------------------------------
#4    Chemical and physical data
#
#     Note that the units for melting point are Kelvin
#     The compound_id is the identifier for the compound in the published
#       paper, eg. 4a, II, etc.
#     Provide a brief description of any significant biological activity,
#       eg. antimalarial activity
#     If the compound exhibits polymorphism provide brief details,
#       eg. monoclinic form, low-temperature phase, etc.
#     For chemdiag  leave blank - no longer necessary
 
_ccdc_compound_id                  ?
_ccdc_biological_activity          ?
_ccdc_polymorph                    ?
 
_ccdc_chemdiag_type                ?
_ccdc_chemdiag_records
;
?
;
#
#-------------------------------------------------------------------------
#5    Other data relating to the structure determination and refinement
#
#     Record the radiation type if not X-rays, eg. neutron
#     Record the temperature of the data collection (Kelvin)
#       if not room-temperature
#     Record R_squared if this is the only reliability factor given by
#       your refinement program
#     Describe briefly any disorder, eg. t-Butyl C31-33 disordered over
#       two sites with occupancies 0.6 and 0.4
#     Under ccdc_comments record any other important information
 
_ccdc_temp_data_collection          ?
_ccdc_ls_R_squared                  ?
_ccdc_disorder                      ?
_ccdc_comments
;
?
;
#-------------------------------------------------------------------------
#6    Include your "standard" CIF file here
#     It should contain the following data items:
#       unit cell parameters and volume, z value, space group symbol,
#       R-factor(s), atomic coordinates with standard deviations,
#       occupancy factors, bond lengths and bond angles
#     Other data items may be present but will not necessarily be
#       included in the Cambridge Structural Database
#
#     Do NOT include structure factors
#
#
#-------------------------------------------------------------------------
#SUBMISSION INFORMATION
#
#     For a journal send the form to the address specified by the journal
#
#     For a private communication to the CCDC send the form to the address
#       deposit@ccdc.cam.ac.uk
#
#     For up-to-date information on deposition procedures, check the website
#       http://www.ccdc.cam.ac.uk/
 
data_ln097
 
_audit_creation_date                    2008-10-04T00:11:06-00:00
_audit_creation_method                  'WinGX routine CIF_UPDATE'
 
#----------------------------------------------------------------------------#
#                   CHEMICAL INFORMATION                                     #
#----------------------------------------------------------------------------#
 
_chemical_name_systematic
;
 ?
;
_chemical_name_common                   La2(H2L)
_chemical_formula_moiety   		La2[(HO3P)(O3P)-CH-C6H4-CH-(PO3)(PO3H)]�8H2O
_chemical_formula_sum                   'C8 H24 La2 O20 P4'
_chemical_formula_weight                841.97
 
#----------------------------------------------------------------------------#
#                   UNIT CELL INFORMATION                                    #
#----------------------------------------------------------------------------#
 
_symmetry_cell_setting                  triclinic
_symmetry_space_group_name_H-M          P-1
loop_
    _symmetry_equiv_pos_as_xyz
'x, y, z'
'-x, -y, -z'
 
_cell_length_a                          6.2659(2)
_cell_length_b                          9.8383(2)
_cell_length_c                          10.4758(2)
_cell_angle_alpha                       99.7269(15)
_cell_angle_beta                        103.6343(14)
_cell_angle_gamma                       107.8791(14)
_cell_volume                            576.59(2)
_cell_formula_units_Z                   1
_cell_measurement_temperature           200(2)
_cell_measurement_reflns_used           11955
_cell_measurement_theta_min             3.134
_cell_measurement_theta_max             27.485
 
#----------------------------------------------------------------------------#
#                   CRYSTAL INFORMATION                                      #
#----------------------------------------------------------------------------#
 
_exptl_crystal_description              block
_exptl_crystal_colour                   colourless
_exptl_crystal_size_max                 0.12
_exptl_crystal_size_mid                 0.06
_exptl_crystal_size_min                 0.05
_exptl_crystal_density_diffrn           2.425
_exptl_crystal_density_method           'not measured'
_exptl_crystal_F_000                    406
loop_
    _exptl_crystal_face_index_h
    _exptl_crystal_face_index_k
    _exptl_crystal_face_index_l
    _exptl_crystal_face_perp_dist
0 -1 0 0.015
0 1 0 0.035
0 0 1 0.035
0 0 -1 0.025
1 0 0 0.08
-1 0 0 0.04
 
_exptl_special_details
;
 ?
;
 
#----------------------------------------------------------------------------#
#                   ABSORPTION CORRECTION                                    #
#----------------------------------------------------------------------------#
 
_exptl_absorpt_coefficient_mu           4.023
_exptl_absorpt_correction_type          none
 
#----------------------------------------------------------------------------#
#                   DATA COLLECTION                                          #
#----------------------------------------------------------------------------#
 
_diffrn_ambient_temperature             200(2)
_diffrn_radiation_wavelength            0.71073
_diffrn_radiation_type                  MoK\a
_diffrn_radiation_monochromator         graphite
_diffrn_detector_area_resol_mean        9
_diffrn_orient_matrix_type
                                     'by Bruker AXS Collect from scalepack cell'
_diffrn_orient_matrix_ub_11             0.1078574
_diffrn_orient_matrix_ub_12             -0.0528127
_diffrn_orient_matrix_ub_13             0.030748
_diffrn_orient_matrix_ub_21             -0.0712688
_diffrn_orient_matrix_ub_22             -0.0749226
_diffrn_orient_matrix_ub_23             -0.0902522
_diffrn_orient_matrix_ub_31             0.1196909
_diffrn_orient_matrix_ub_32             0.0619454
_diffrn_orient_matrix_ub_33             -0.035529
_diffrn_measurement_device              '95mm CCD camera on \k-goniostat'
_diffrn_measurement_device_type         KappaCCD
_diffrn_reflns_av_R_equivalents         0.0182
_diffrn_reflns_av_unetI/netI            0.0172
_diffrn_reflns_number                   12625
_diffrn_reflns_limit_h_min              -8
_diffrn_reflns_limit_h_max              8
_diffrn_reflns_limit_k_min              -12
_diffrn_reflns_limit_k_max              12
_diffrn_reflns_limit_l_min              -13
_diffrn_reflns_limit_l_max              13
_diffrn_reflns_theta_min                3.44
_diffrn_reflns_theta_max                27.51
_diffrn_reflns_theta_full               27.51
_diffrn_measured_fraction_theta_full
                                        0.996
_diffrn_measured_fraction_theta_max
                                        0.996
_reflns_number_total                    2638
_reflns_number_gt                       2570
_reflns_threshold_expression            >2sigma(I)
 
#----------------------------------------------------------------------------#
#                   COMPUTER PROGRAMS USED                                   #
#----------------------------------------------------------------------------#
 
_computing_data_collection              'Collect (Bruker AXS BV, 1997-2004)'
_computing_cell_refinement
                                       'HKL Scalepack (Otwinowski & Minor 1997)'
_computing_data_reduction
                             'HKL Denzo and Scalepack (Otwinowski & Minor 1997)'
_computing_structure_refinement         'SHELXL-97 (Sheldrick, 1997)'
 
#----------------------------------------------------------------------------#
#                   REFINEMENT INFORMATION                                   #
#----------------------------------------------------------------------------#
 
_refine_special_details
;
 Refinement of F^2^ against ALL reflections.  The weighted R-factor wR and
 goodness of fit S are based on F^2^, conventional R-factors R are based
 on F, with F set to zero for negative F^2^. The threshold expression of
 F^2^ > 2sigma(F^2^) is used only for calculating R-factors(gt) etc. and is
 not relevant to the choice of reflections for refinement.  R-factors based
 on F^2^ are statistically about twice as large as those based on F, and R-
 factors based on ALL data will be even larger.
;
_refine_ls_structure_factor_coef        Fsqd
_refine_ls_matrix_type                  full
_refine_ls_weighting_scheme             calc
_refine_ls_weighting_details
         'calc w=1/[\s^2^(Fo^2^)+(0.0100P)^2^+0.8117P] where P=(Fo^2^+2Fc^2^)/3'
_atom_sites_solution_primary            direct
_atom_sites_solution_secondary          difmap
_atom_sites_solution_hydrogens          geom
_refine_ls_hydrogen_treatment           mixed
_refine_ls_extinction_method            none
_refine_ls_number_reflns                2638
_refine_ls_number_parameters            191
_refine_ls_number_restraints            10
_refine_ls_R_factor_all                 0.0145
_refine_ls_R_factor_gt                  0.0139
_refine_ls_wR_factor_ref                0.0337
_refine_ls_wR_factor_gt                 0.0334
_refine_ls_goodness_of_fit_ref          1.089
_refine_ls_restrained_S_all             1.087
_refine_ls_shift/su_max                 0.001
_refine_ls_shift/su_mean                0
_refine_diff_density_max                1.073
_refine_diff_density_min                -0.451
_refine_diff_density_rms                0.081
 
#----------------------------------------------------------------------------#
#                   ATOMIC TYPES, COORDINATES AND THERMAL PARAMETERS         #
#----------------------------------------------------------------------------#
 
loop_
    _atom_type_symbol
    _atom_type_description
    _atom_type_scat_dispersion_real
    _atom_type_scat_dispersion_imag
    _atom_type_scat_source
C C 0.0033 0.0016 'International Tables Vol C Tables 4.2.6.8 and 6.1.1.4'
H H 0 0 'International Tables Vol C Tables 4.2.6.8 and 6.1.1.4'
O O 0.0106 0.006 'International Tables Vol C Tables 4.2.6.8 and 6.1.1.4'
P P 0.1023 0.0942 'International Tables Vol C Tables 4.2.6.8 and 6.1.1.4'
La La -0.2871 2.4523 'International Tables Vol C Tables 4.2.6.8 and 6.1.1.4'
 
loop_
    _atom_site_label
    _atom_site_type_symbol
    _atom_site_fract_x
    _atom_site_fract_y
    _atom_site_fract_z
    _atom_site_U_iso_or_equiv
    _atom_site_adp_type
    _atom_site_occupancy
    _atom_site_symmetry_multiplicity
    _atom_site_calc_flag
    _atom_site_refinement_flags
    _atom_site_disorder_assembly
    _atom_site_disorder_group
La La -0.236800(18) 0.477658(11) 0.157853(10) 0.00731(4) Uani 1 1 d . . .
P1 P 0.40165(8) 0.62413(5) 0.23185(5) 0.00738(9) Uani 1 1 d . . .
P2 P 0.17603(9) 0.80940(5) 0.09752(5) 0.00862(10) Uani 1 1 d . . .
O1 O 0.1855(2) 0.54987(15) 0.27249(14) 0.0120(3) Uani 1 1 d . . .
O2 O -0.0510(2) 0.72194(15) 0.12023(14) 0.0130(3) Uani 1 1 d . . .
O3 O 0.6294(2) 0.62389(15) 0.32471(13) 0.0112(3) Uani 1 1 d . . .
O4 O 0.3853(2) 0.55039(15) 0.08640(13) 0.0108(3) Uani 1 1 d . . .
O5 O 0.1973(3) 0.97368(15) 0.11039(15) 0.0129(3) Uani 1 1 d D . .
O6 O 0.1966(3) 0.75044(16) -0.04028(14) 0.0144(3) Uani 1 1 d . . .
O7 O -0.6196(3) 0.26677(17) 0.10490(17) 0.0206(3) Uani 1 1 d D . .
O9 O 0.0389(3) 0.90816(19) -0.22026(16) 0.0218(3) Uani 1 1 d D . .
O8 O -0.2367(4) 0.3614(2) 0.3636(2) 0.0340(4) Uani 1 1 d D . .
O10 O 0.6851(4) 0.6683(2) 0.59384(17) 0.0324(4) Uani 1 1 d D . .
C1 C 0.4235(3) 0.8131(2) 0.23153(19) 0.0087(3) Uani 1 1 d . . .
C2 C 0.4583(3) 0.9086(2) 0.37037(19) 0.0097(4) Uani 1 1 d . . .
C3 C 0.2734(4) 0.9057(2) 0.4236(2) 0.0147(4) Uani 1 1 d . . .
C4 C 0.6837(4) 1.0037(2) 0.4487(2) 0.0137(4) Uani 1 1 d . . .
H1 H 0.558(6) 0.853(4) 0.203(3) 0.043(3) Uiso 1 1 d . . .
H3 H 0.118(6) 0.844(4) 0.374(3) 0.043(3) Uiso 1 1 d . . .
H4 H 0.807(6) 1.008(4) 0.414(3) 0.043(3) Uiso 1 1 d . . .
H5 H 0.113(5) 1.003(3) 0.148(3) 0.043(3) Uiso 1 1 d D . .
H91 H 0.101(5) 0.870(3) -0.166(3) 0.043(3) Uiso 1 1 d D . .
H92 H -0.059(4) 0.838(2) -0.282(2) 0.043(3) Uiso 1 1 d D . .
H71 H -0.721(4) 0.267(4) 0.039(2) 0.043(3) Uiso 1 1 d D . .
H72 H -0.635(6) 0.1797(12) 0.097(3) 0.043(3) Uiso 1 1 d D . .
H102 H 0.693(6) 0.659(3) 0.5158(13) 0.043(3) Uiso 1 1 d D . .
H101 H 0.722(6) 0.601(2) 0.618(3) 0.043(3) Uiso 1 1 d D . .
H81 H -0.363(3) 0.339(4) 0.380(3) 0.043(3) Uiso 1 1 d D . .
H82 H -0.112(3) 0.379(4) 0.422(3) 0.043(3) Uiso 1 1 d D . .
 
loop_
    _atom_site_aniso_label
    _atom_site_aniso_U_11
    _atom_site_aniso_U_22
    _atom_site_aniso_U_33
    _atom_site_aniso_U_23
    _atom_site_aniso_U_13
    _atom_site_aniso_U_12
La 0.00809(6) 0.00723(6) 0.00670(6) 0.00112(4) 0.00247(4) 0.00310(4)
P1 0.0086(2) 0.0078(2) 0.0059(2) 0.00094(17) 0.00193(18) 0.00380(18)
P2 0.0109(2) 0.0063(2) 0.0080(2) 0.00069(17) 0.00163(18) 0.00360(18)
O1 0.0095(6) 0.0134(7) 0.0145(7) 0.0054(5) 0.0046(5) 0.0043(5)
O2 0.0112(7) 0.0102(7) 0.0157(7) 0.0047(5) 0.0015(6) 0.0026(5)
O3 0.0110(7) 0.0153(7) 0.0082(6) 0.0019(5) 0.0020(5) 0.0070(6)
O4 0.0161(7) 0.0090(6) 0.0072(6) 0.0004(5) 0.0027(5) 0.0062(6)
O5 0.0160(7) 0.0075(7) 0.0181(7) 0.0040(5) 0.0072(6) 0.0061(6)
O6 0.0216(8) 0.0152(7) 0.0082(6) 0.0016(5) 0.0032(6) 0.0110(6)
O7 0.0136(7) 0.0132(7) 0.0317(9) 0.0103(7) 0.0017(7) 0.0019(6)
O9 0.0290(9) 0.0244(9) 0.0204(8) 0.0103(7) 0.0111(7) 0.0160(7)
O8 0.0411(12) 0.0496(12) 0.0322(10) 0.0277(9) 0.0205(9) 0.0286(10)
O10 0.0543(12) 0.0277(10) 0.0151(8) 0.0072(7) 0.0098(8) 0.0145(9)
C1 0.0100(9) 0.0079(9) 0.0080(9) -0.0001(7) 0.0036(7) 0.0034(7)
C2 0.0134(9) 0.0077(9) 0.0082(9) 0.0012(7) 0.0029(7) 0.0049(7)
C3 0.0102(9) 0.0157(10) 0.0128(10) -0.0023(8) 0.0026(8) 0.0014(8)
C4 0.0112(9) 0.0155(10) 0.0129(9) -0.0006(8) 0.0056(8) 0.0039(8)
 
 
#----------------------------------------------------------------------------#
#                   MOLECULAR GEOMETRY                                       #
#----------------------------------------------------------------------------#
 
_geom_special_details
;
 All esds (except the esd in the dihedral angle between two l.s. planes)
 are estimated using the full covariance matrix.  The cell esds are taken
 into account individually in the estimation of esds in distances, angles
 and torsion angles; correlations between esds in cell parameters are only
 used when they are defined by crystal symmetry.  An approximate (isotropic)
 treatment of cell esds is used for estimating esds involving l.s. planes.
;
loop_
    _geom_bond_atom_site_label_1
    _geom_bond_atom_site_label_2
    _geom_bond_distance
    _geom_bond_site_symmetry_2
    _geom_bond_publ_flag
La O4 2.4435(13) 2_565 ?
La O1 2.4514(14) . ?
La O2 2.4709(14) . ?
La O6 2.4851(14) 2_565 ?
La O7 2.5086(15) . ?
La O3 2.5316(13) 1_455 ?
La O8 2.6055(17) . ?
La O4 2.6578(13) 1_455 ?
La P1 3.2038(5) 1_455 ?
P1 O1 1.5225(14) . ?
P1 O3 1.5271(14) . ?
P1 O4 1.5381(13) . ?
P1 C1 1.8219(19) . ?
P1 La 3.2038(5) 1_655 ?
P2 O6 1.5125(14) . ?
P2 O2 1.5156(15) . ?
P2 O5 1.5601(14) . ?
P2 C1 1.8162(19) . ?
O3 La 2.5316(13) 1_655 ?
O4 La 2.4435(13) 2_565 ?
O4 La 2.6578(13) 1_655 ?
O5 H5 0.820(5) . ?
O6 La 2.4851(14) 2_565 ?
O7 H71 0.821(5) . ?
O7 H72 0.820(5) . ?
O9 H91 0.820(5) . ?
O9 H92 0.821(5) . ?
O8 H81 0.820(5) . ?
O8 H82 0.818(5) . ?
O10 H102 0.822(5) . ?
O10 H101 0.822(5) . ?
C1 C2 1.519(3) . ?
C1 H1 0.96(3) . ?
C2 C4 1.388(3) . ?
C2 C3 1.394(3) . ?
C3 C4 1.392(3) 2_676 ?
C3 H3 0.94(3) . ?
C4 C3 1.392(3) 2_676 ?
C4 H4 0.92(3) . ?
 
loop_
    _geom_angle_atom_site_label_1
    _geom_angle_atom_site_label_2
    _geom_angle_atom_site_label_3
    _geom_angle
    _geom_angle_site_symmetry_1
    _geom_angle_site_symmetry_3
    _geom_angle_publ_flag
O4 La O1 120.97(5) 2_565 . ?
O4 La O2 73.81(5) 2_565 . ?
O1 La O2 74.83(4) . . ?
O4 La O6 73.05(4) 2_565 2_565 ?
O1 La O6 83.77(5) . 2_565 ?
O2 La O6 122.35(5) . 2_565 ?
O4 La O7 81.21(5) 2_565 . ?
O1 La O7 140.81(5) . . ?
O2 La O7 144.28(5) . . ?
O6 La O7 71.89(5) 2_565 . ?
O4 La O3 120.81(4) 2_565 1_455 ?
O1 La O3 103.39(4) . 1_455 ?
O2 La O3 83.34(5) . 1_455 ?
O6 La O3 154.24(5) 2_565 1_455 ?
O7 La O3 88.13(5) . 1_455 ?
O4 La O8 148.85(6) 2_565 . ?
O1 La O8 77.94(6) . . ?
O2 La O8 137.32(6) . . ?
O6 La O8 86.00(6) 2_565 . ?
O7 La O8 70.32(6) . . ?
O3 La O8 71.73(5) 1_455 . ?
O4 La O4 66.33(5) 2_565 1_455 ?
O1 La O4 149.95(4) . 1_455 ?
O2 La O4 80.48(4) . 1_455 ?
O6 La O4 124.54(4) 2_565 1_455 ?
O7 La O4 66.11(5) . 1_455 ?
O3 La O4 56.30(4) 1_455 1_455 ?
O8 La O4 110.86(5) . 1_455 ?
O4 La P1 94.32(3) 2_565 1_455 ?
O1 La P1 129.02(3) . 1_455 ?
O2 La P1 82.49(3) . 1_455 ?
O6 La P1 145.24(4) 2_565 1_455 ?
O7 La P1 74.26(4) . 1_455 ?
O3 La P1 27.86(3) 1_455 1_455 ?
O8 La P1 89.98(4) . 1_455 ?
O4 La P1 28.53(3) 1_455 1_455 ?
O1 P1 O3 113.04(8) . . ?
O1 P1 O4 113.05(8) . . ?
O3 P1 O4 106.16(8) . . ?
O1 P1 C1 108.72(8) . . ?
O3 P1 C1 110.24(8) . . ?
O4 P1 C1 105.34(8) . . ?
O1 P1 La 126.51(6) . 1_655 ?
O3 P1 La 50.77(5) . 1_655 ?
O4 P1 La 55.61(5) . 1_655 ?
C1 P1 La 124.77(6) . 1_655 ?
O6 P2 O2 113.79(8) . . ?
O6 P2 O5 107.42(8) . . ?
O2 P2 O5 110.15(8) . . ?
O6 P2 C1 110.04(8) . . ?
O2 P2 C1 108.88(8) . . ?
O5 P2 C1 106.28(8) . . ?
P1 O1 La 131.79(8) . . ?
P2 O2 La 138.67(8) . . ?
P1 O3 La 101.37(7) . 1_655 ?
P1 O4 La 148.29(8) . 2_565 ?
P1 O4 La 95.86(6) . 1_655 ?
La O4 La 113.67(5) 2_565 1_655 ?
P2 O5 H5 117(2) . . ?
P2 O6 La 135.94(8) . 2_565 ?
La O7 H71 112(2) . . ?
La O7 H72 125(2) . . ?
H71 O7 H72 106(3) . . ?
H91 O9 H92 105(3) . . ?
La O8 H81 114(2) . . ?
La O8 H82 119(2) . . ?
H81 O8 H82 122(3) . . ?
H102 O10 H101 104.2(12) . . ?
C2 C1 P2 114.15(13) . . ?
C2 C1 P1 113.51(13) . . ?
P2 C1 P1 109.36(10) . . ?
C2 C1 H1 109(2) . . ?
P2 C1 H1 104.8(19) . . ?
P1 C1 H1 105.1(19) . . ?
C4 C2 C3 117.92(18) . . ?
C4 C2 C1 119.06(17) . . ?
C3 C2 C1 123.02(18) . . ?
C4 C3 C2 120.37(19) 2_676 . ?
C4 C3 H3 118(2) 2_676 . ?
C2 C3 H3 121(2) . . ?
C2 C4 C3 121.72(19) . 2_676 ?
C2 C4 H4 119(2) . . ?
C3 C4 H4 119(2) 2_676 . ?
 
loop_
    _geom_torsion_atom_site_label_1
    _geom_torsion_atom_site_label_2
    _geom_torsion_atom_site_label_3
    _geom_torsion_atom_site_label_4
    _geom_torsion
    _geom_torsion_site_symmetry_1
    _geom_torsion_site_symmetry_2
    _geom_torsion_site_symmetry_3
    _geom_torsion_site_symmetry_4
    _geom_torsion_publ_flag
O3 P1 O1 La -170.20(9) . . . . ?
O4 P1 O1 La -49.55(12) . . . . ?
C1 P1 O1 La 67.05(12) . . . . ?
La P1 O1 La -112.89(8) 1_655 . . . ?
O4 La O1 P1 19.20(13) 2_565 . . . ?
O2 La O1 P1 -40.83(10) . . . . ?
O6 La O1 P1 85.14(11) 2_565 . . . ?
O7 La O1 P1 136.18(10) . . . . ?
O3 La O1 P1 -119.99(10) 1_455 . . . ?
O8 La O1 P1 172.37(12) . . . . ?
O4 La O1 P1 -76.66(14) 1_455 . . . ?
P1 La O1 P1 -107.63(10) 1_455 . . . ?
O6 P2 O2 La 70.90(14) . . . . ?
O5 P2 O2 La -168.41(11) . . . . ?
C1 P2 O2 La -52.23(14) . . . . ?
O4 La O2 P2 -94.76(13) 2_565 . . . ?
O1 La O2 P2 34.57(12) . . . . ?
O6 La O2 P2 -37.67(14) 2_565 . . . ?
O7 La O2 P2 -142.19(11) . . . . ?
O3 La O2 P2 140.43(13) 1_455 . . . ?
O8 La O2 P2 86.74(14) . . . . ?
O4 La O2 P2 -162.72(13) 1_455 . . . ?
P1 La O2 P2 168.50(12) 1_455 . . . ?
O1 P1 O3 La 119.17(7) . . . 1_655 ?
O4 P1 O3 La -5.31(8) . . . 1_655 ?
C1 P1 O3 La -118.92(8) . . . 1_655 ?
O1 P1 O4 La 81.41(17) . . . 2_565 ?
O3 P1 O4 La -154.10(14) . . . 2_565 ?
C1 P1 O4 La -37.16(18) . . . 2_565 ?
La P1 O4 La -159.09(18) 1_655 . . 2_565 ?
O1 P1 O4 La -119.50(7) . . . 1_655 ?
O3 P1 O4 La 4.99(8) . . . 1_655 ?
C1 P1 O4 La 121.93(7) . . . 1_655 ?
O2 P2 O6 La -66.85(14) . . . 2_565 ?
O5 P2 O6 La 170.94(11) . . . 2_565 ?
C1 P2 O6 La 55.64(14) . . . 2_565 ?
O6 P2 C1 C2 163.70(13) . . . . ?
O2 P2 C1 C2 -70.95(15) . . . . ?
O5 P2 C1 C2 47.68(15) . . . . ?
O6 P2 C1 P1 -67.92(12) . . . . ?
O2 P2 C1 P1 57.43(12) . . . . ?
O5 P2 C1 P1 176.07(9) . . . . ?
O1 P1 C1 C2 62.52(15) . . . . ?
O3 P1 C1 C2 -61.92(15) . . . . ?
O4 P1 C1 C2 -176.05(13) . . . . ?
La P1 C1 C2 -117.55(12) 1_655 . . . ?
O1 P1 C1 P2 -66.22(11) . . . . ?
O3 P1 C1 P2 169.35(9) . . . . ?
O4 P1 C1 P2 55.22(11) . . . . ?
La P1 C1 P2 113.72(8) 1_655 . . . ?
P2 C1 C2 C4 -134.86(17) . . . . ?
P1 C1 C2 C4 98.90(19) . . . . ?
P2 C1 C2 C3 45.0(2) . . . . ?
P1 C1 C2 C3 -81.3(2) . . . . ?
C4 C2 C3 C4 0.0(3) . . . 2_676 ?
C1 C2 C3 C4 -179.78(18) . . . 2_676 ?
C3 C2 C4 C3 0.0(3) . . . 2_676 ?
C1 C2 C4 C3 179.79(19) . . . 2_676 ?
 
loop_
    _geom_hbond_atom_site_label_D
    _geom_hbond_atom_site_label_H
    _geom_hbond_atom_site_label_A
    _geom_hbond_distance_DH
    _geom_hbond_distance_HA
    _geom_hbond_distance_DA
    _geom_hbond_angle_DHA
    _geom_hbond_site_symmetry_A
O5 H5 O9 0.820(5) 1.694(8) 2.505(2) 170(3) 2_575
O9 H91 O6 0.820(5) 2.016(8) 2.827(2) 170(3) .
O9 H92 O10 0.821(5) 1.921(8) 2.734(3) 170(3) 1_454
O7 H71 O2 0.821(5) 1.968(6) 2.788(2) 177(3) 2_465
O7 H72 O5 0.820(5) 2.021(16) 2.773(2) 152(3) 1_445
O10 H102 O3 0.822(5) 1.895(9) 2.700(2) 166(3) .
O10 H101 O1 0.822(5) 2.156(8) 2.962(2) 167(2) 2_666
O8 H81 O10 0.820(5) 2.081(10) 2.882(3) 165(3) 2_566
O8 H82 O1 0.818(5) 3.01(3) 3.183(2) 94(2) .
 
